# Supplementary material for: Engineering a lipase B from Candida antactica with efficient perhydrolysis performance by eliminating its hydrolase activity
Source: PubMed Central journal article supplement (PMC5357956; doi:10.1038/srep44599), 2017-03-20
Supplement: srep44599-s1.pdf [file srep44599-s1.pdf]

**Supporting Information for:**

**Engineering a lipase B from *Candida antactica* with efficient perhydrolysis performance by eliminating its hydrolase activity**

Xu-Ping Wang<sup>1</sup>, Peng-Fei Zhou<sup>2</sup>, Zhi-Gang Li<sup>2</sup>, Bo Yang<sup>2</sup>, Frank Hollmann<sup>3</sup> and Yong-Hua Wang<sup>1,\*</sup>

<sup>1</sup> School of Food Sciences and Engineering, South China University of Technology, Wushan road 381, Tianhe District, 510640 Guangzhou, P.R. China

<sup>2</sup> School of Bioscience and Bioengineering, South China University of Technology, Daxuecheng, Panyu District, 510006 Guangzhou 510006, P.R. China

<sup>3</sup> Department of Biotechnology, Delft University of Technology, Van der Maasweg 9, 2629HZ Delft, The Netherlands

\*Corresponding author:

yonghw@scut.edu.cn (Yong-Hua Wang)

Other authors:

wangxuping88@163.com (Xu-Ping Wang)

bipfzhougz@mail.scut.edu.cn (Peng-Fei Zhou)

bizgl@scut.edu.cn (Zhi-Gang Li)

yangbo@scut.edu.cn (Bo Yang)

F.Hollmann@tudelft.nl (Frank Hollmann)

**Table of Contents**

**Figure S1.** SDS/PAGE of purified wt-CalB and Ser105Ala mutant

**Figure S2.** Hydrolysis of  $\epsilon$ -caprolactone in reaction medium

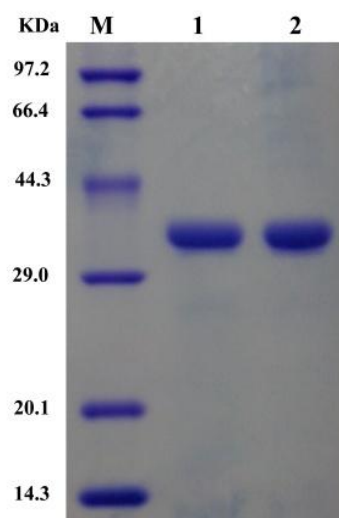

**Figure S1. SDS/PAGE of purified wt-CalB and Ser105Ala mutant.** Lane 1, wt-CalB; Lane 2, Ser105Ala mutant.

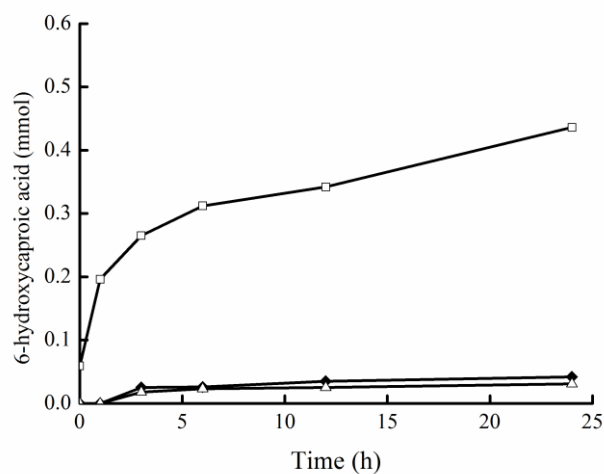

**Figure S2. Hydrolysis of  $\epsilon$ -caprolactone in reaction medium.** ( $\square$ ) wt-CalB, ( $\blacklozenge$ ) Ser105Ala mutant, ( $\triangle$ ) Thermally inactivated CalB. General conditions:  $\epsilon$ -caprolactone (1 mmol), 30% aq.  $\text{H}_2\text{O}_2$  (2 mmol), octanoic acid (1 mmol), 5 mg CalB (wild-type or S105A),  $\text{H}_2\text{O}$  (1 mL), *n*-hexane (2 mL).  $T = 40^\circ\text{C}$ .
